# Supplementary material for: Predictive value of baseline 18F-FDG PET/CT and interim treatment response for the prognosis of patients with diffuse large B-cell lymphoma receiving R-CHOP chemotherapy
Source: PubMed Central journal article supplement — Oncol Lett. 2020 Dec 18;21(2):132. doi: 10.3892/ol.2020.12393 (PMC7798034; doi:10.3892/ol.2020.12393), 2020-12-18
Supplement: Supplementary_Data.pdf [file Supplementary_Data.pdf]

Table SI. Interobserver agreement of baseline PET/CT parameter measurements.

| Parameter | ICC   | 95% CI      |
|-----------|-------|-------------|
| SUVmax    | 0.991 | 0.896-0.999 |
| SUVmean   | 0.974 | 0.861-0.992 |
| MTVmax    | 0.785 | 0.691-0.883 |
| MTVsum    | 0.732 | 0.608-0.836 |
| TLGmax    | 0.720 | 0.637-0.851 |
| TLGsum    | 0.663 | 0.569-0.812 |
| Dmax      | 0.902 | 0.838-0.960 |

ICC, intraclass correlation coefficient; CI, confidence interval; SUVmax, maximum standardized uptake value; SUVmean, mean standardized uptake value; MTVmax, metabolic tumor volume of the maximum lesion; MTVsum, sum of metabolic tumor volume; TLGmax, total lesion glycolysis of the maximum lesion; TLGsum, sum of total lesion glycolysis; Dmax, maximum diameter of the maximum lesion.

Table SII. Baseline PET/CT parameters of the 64 patients with DLBCL.

|                           | M (Q1, Q3)              | P-value             |
|---------------------------|-------------------------|---------------------|
| SUVmax                    |                         | <0.001 <sup>a</sup> |
| <17.6                     | 11.0 (8.2, 13.0)        |                     |
| ≥17.6                     | 25.3 (20.3, 30.4)       |                     |
| SUVmean                   |                         | <0.001 <sup>a</sup> |
| <10.6                     | 6.6 (4.7, 7.8)          |                     |
| ≥10.6                     | 15.2 (11.9, 18.1)       |                     |
| MTVmax (cm <sup>3</sup> ) |                         | <0.001 <sup>a</sup> |
| <63.5                     | 20.7 (12.4, 33.6)       |                     |
| ≥63.5                     | 145.0 (92.3, 550.5)     |                     |
| MTVsum (cm <sup>3</sup> ) |                         | <0.001 <sup>a</sup> |
| <132.6                    | 45.3 (25.7, 75.6)       |                     |
| ≥132.6                    | 330.4 (172.1, 762.8)    |                     |
| TIGmax (g)                |                         | <0.001 <sup>a</sup> |
| <628.7                    | 126.1 (82.6, 256.7)     |                     |
| ≥628.7                    | 1730.9 (945.3, 3960.8)  |                     |
| TLGsum (g)                |                         | <0.001 <sup>a</sup> |
| <1135.9                   | 335.1 (142.9, 760.8)    |                     |
| ≥1135.9                   | 2764.8 (1637.3, 6580.3) |                     |
| Dmax (cm)                 |                         | <0.001 <sup>a</sup> |
| <5.7                      | 3.9 (2.9, 4.5)          |                     |
| ≥5.7                      | 9.8 (8.1, 13.3)         |                     |

<sup>a</sup>Statistically significant. M (Q1, Q3), median (first quartile, third quartile); SUVmax, maximum standardized uptake value; SUVmean, mean standardized uptake value; MTVmax, metabolic tumor volume of the maximum lesion; MTVsum, sum of metabolic tumor volume; TLGmax, total lesion glycolysis of the maximum lesion; TLGsum, sum of total lesion glycolysis; Dmax, maximum diameter of the maximum lesion.
